# Supplementary material for: Role of Bacterial Surface Components in the Pathogenicity of Proteus mirabilis in a Murine Model of Catheter-Associated Urinary Tract Infection
Source: MDPI journal article supplement (doi:10.3390/pathogens12040509), 2023-03-24
Supplement: s1 [file s1]

**Supplementary Materials:**

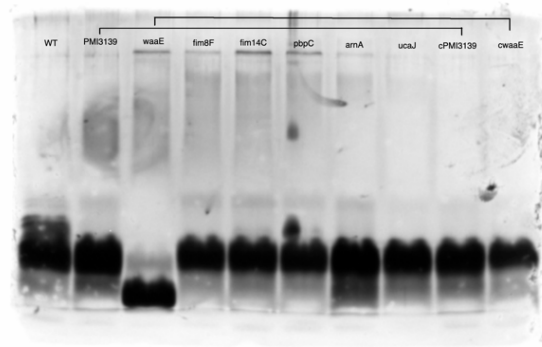

**Figure S1.** LPS of the 10 different *PM* strains separated on a 15% SDS-polyacrylamide gel.
